# Supplementary material for: Real-time colorimetric water content monitoring of organic solvents by an azo dye incorporated into AlPO4-5 nanochannel
Source: Royal Society of Chemistry journal article supplement (doi:10.1039/c9tc01767d), 2019-01-01
Supplement: c9tc01767d1.pdf [file c9tc01767d1.pdf]

## Electronic Supplementary Information

### Real-Time Colorimetric Water Content Monitoring of Organic Solvents by an Azo Dye Incorporated into AlPO<sub>4</sub>-5 Nanochannel

Hyeonji Yoo and Hyun Sung Kim\*

Department of Chemistry, Pukyong National University, Busan 48513 Korea

#### Contents

1. N<sub>2</sub> isotherm of ground AlPO<sub>4</sub>-5
2. The water vapor adsorption isotherm of AlPO<sub>4</sub>-5
3. Characterization of synthesized AZO dye.
4. Inclusion of the AZO dye into AlPO<sub>4</sub>-5 nanochannel in methanol
5. The calculation of concentration for AZO dye encapsulated in AlPO<sub>4</sub>-5
6. The relationship between relativity polarity and sensitivity of for AZO@AlPO<sub>4</sub>-5 in linear primary alcohol.
7. The effect of dye loading on water detection sensitivity
8. Evolution performance of recovered AZO@AlPO<sub>4</sub>-5

### SI.1 N<sub>2</sub> isotherm of ground AlPO<sub>4</sub>-5

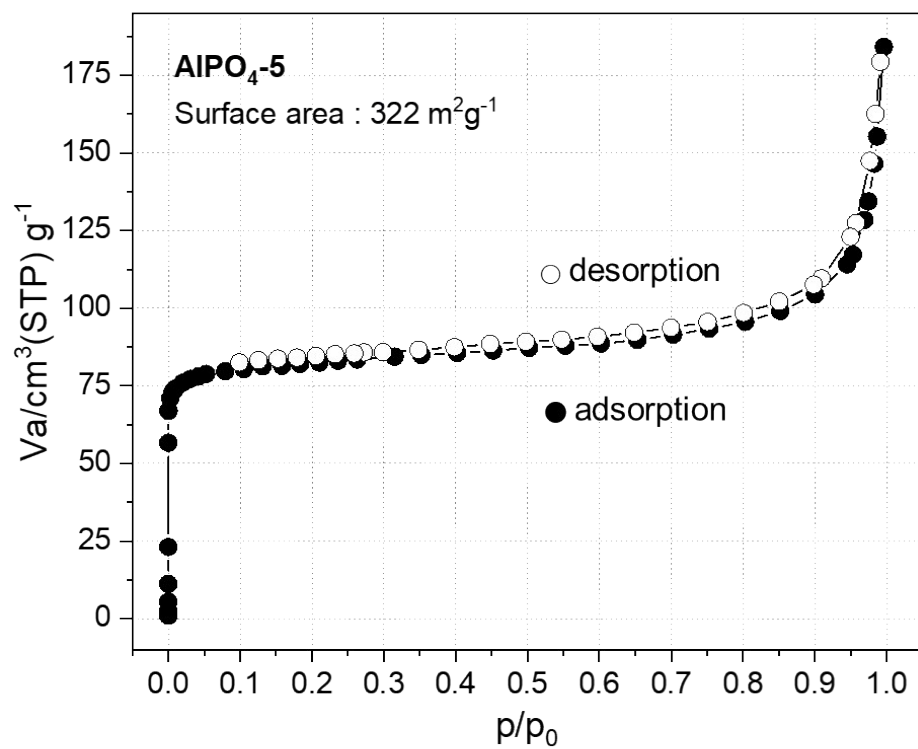

Fig. S1 N<sub>2</sub> isotherm of ground AlPO<sub>4</sub>-5 from BET as indicated.

**SI. 2 The water vapor adsorption isotherm of  $\text{AlPO}_4\text{-5}$  and  $\text{AZO@AlPO}_4\text{-5}$**

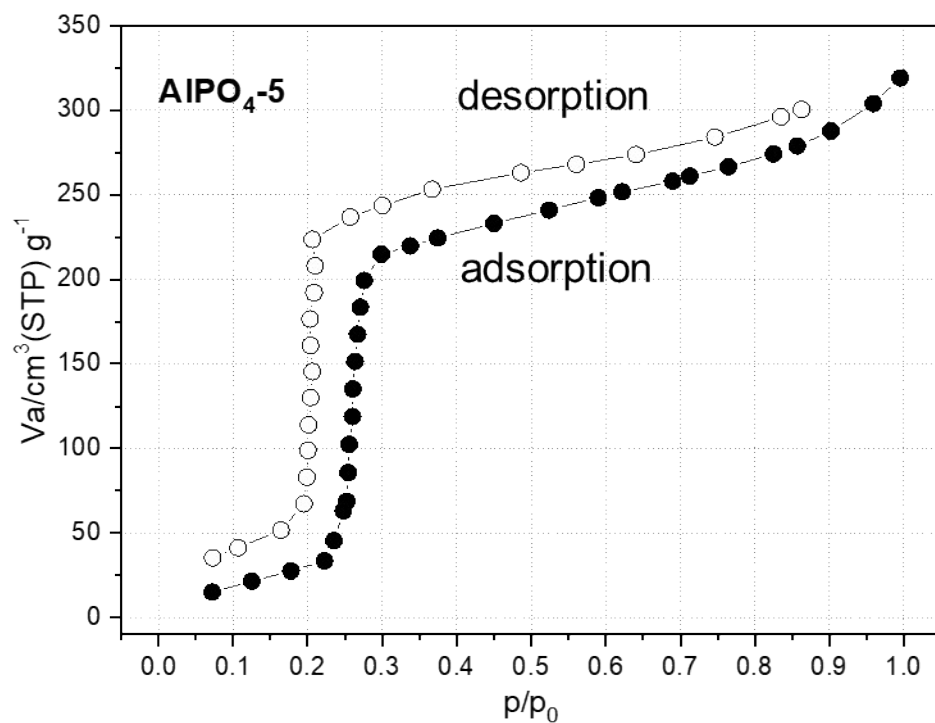

**Fig. S2** The water vapor adsorption isotherm of  $\text{AlPO}_4\text{-5}$ .

### SI. 3 Characterization of synthesized AZO dye.

**Table S1.** Results of  $^1\text{H}$  NMR,  $^{13}\text{C}$  NMR and HR-MS.

| $^1\text{H}$ NMR ( $\text{CDCl}_3$ )<br>Chemical shift, $\delta$ /ppm, J/Hz                                                                                                                                    | $^{13}\text{C}$ NMR ( $\text{CDCl}_3$ )<br>Chemical shift, $\delta$ /ppm                                               | MS-ESI-TOF (m/z)<br>$\text{C}_{16}\text{H}_{21}\text{N}_4$ |
|----------------------------------------------------------------------------------------------------------------------------------------------------------------------------------------------------------------|------------------------------------------------------------------------------------------------------------------------|------------------------------------------------------------|
| $\delta_{\text{H}}$ (600 MHz) 9.16 (2 H, d, $J$ 7.1),<br>8.03 (2 H, d, $J$ 7.0), 7.90 (2 H, d, $J$<br>9.4), 6.74 (2 H, d, $J$ 9.4), 4.82 (2 H,<br>s), 3.19 (6 H, s), 2.04 (2 H, m), 1.00<br>(3 H, t, $J$ 7.4). | $\delta_{\text{C}}$ (151 MHz) 162.07, 155.95,<br>145.58, 144.87, 127.76, 119.26,<br>112.37, 62.06, 40.58, 25.32, 10.68 | Calculated: 269.1761<br>Found: 269.1758                    |

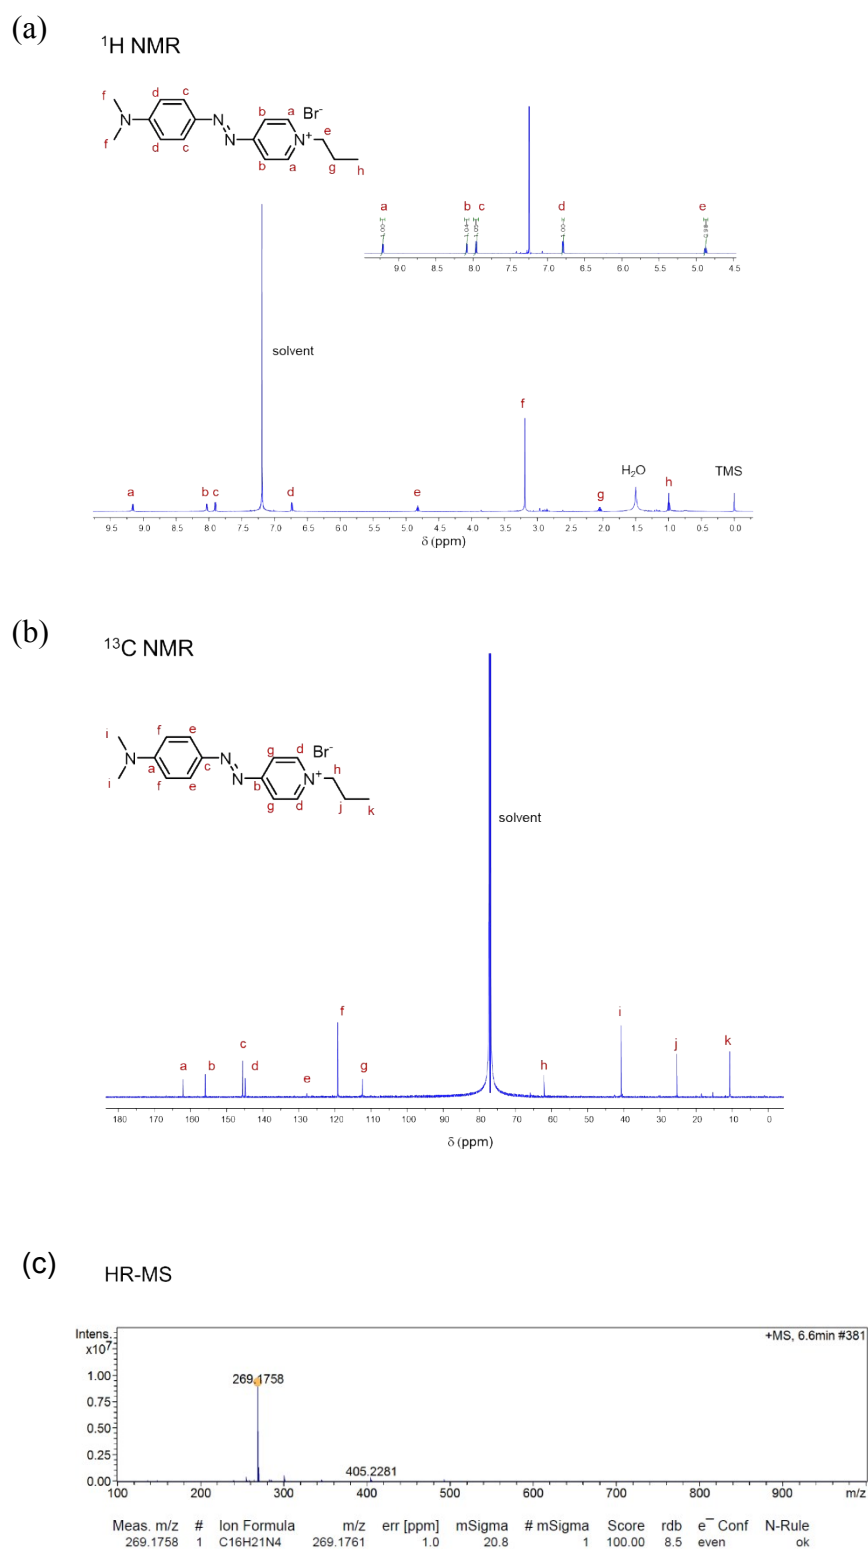

**Fig. S3** The spectra of (a)  $^1\text{H}$  NMR (b)  $^{13}\text{C}$  NMR and (c) HR-MS as indicated.

## SI. 4 Inclusion of the AZO dye into $\text{AlPO}_4\text{-5}$ nanochannel in methanol

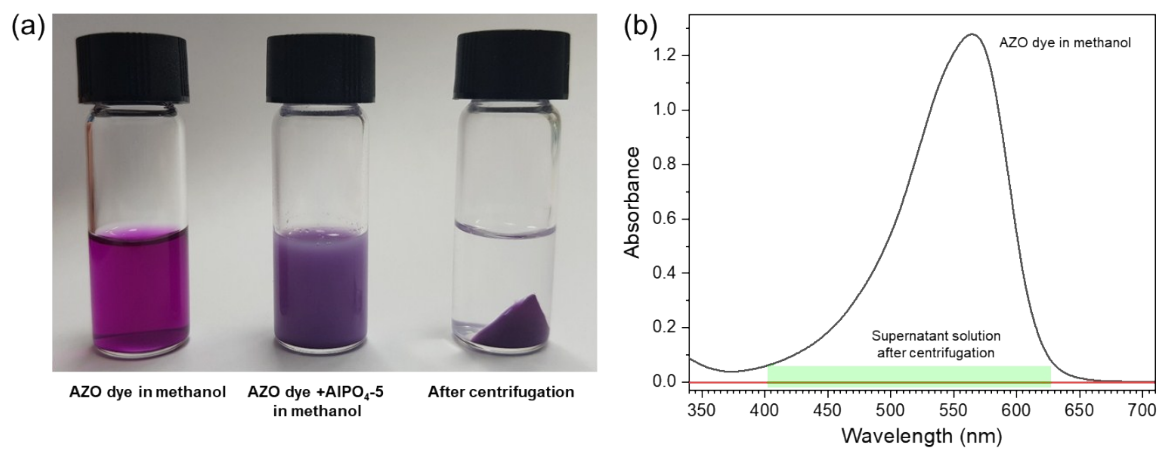

**Fig. S4** (a) Digital photographic images (before, after incorporation of the AZO dye and after centrifugation) and (b) UV-vis spectra of the supernatant solution that depicts the process of the complete incorporation of the AZO dye into  $\text{AlPO}_4\text{-5}$ .

## SI. 5 The calculation of concentration for AZO dye encapsulated in $\text{AlPO}_4\text{-5}$

Chemical composition of  $\text{AlPO}_4\text{-5}$ 's unit cell:

Molecular weight of  $\text{AlPO}_4\text{-5}$ 's unit cell:

(1) The # mole of unit cell in  $\text{AlPO}_4\text{-5}$  (1.00g)

→  $1.00 / (\text{molecular weight of unit cell})$

→  **$6.83 \times 10^{-4}$  mole**

(2) We have confirmed that AZO dye in methanol solution (10 mL, 0.23 mM) completely incorporated into  $\text{AlPO}_4\text{-5}$  (1.00 g) using UV-vis spectroscopy analysis.

The total # mole of AZO dye incorporated into  $\text{AlPO}_4\text{-5}$

(1.00g)

→  **$2.30 \times 10^{-6}$  mole**

(3) The number of AZO dye in a  $\text{AlPO}_4\text{-5}$ 's unit cell

→ [value from (2)] / [value from (1)]

→  **$3.37 \times 10^{-3}$**

(4) The volume of  $\text{AlPO}_4\text{-5}$ 's unit cell

→  $1420.6 \text{ \AA}^3$

→  $1.4206 \times 10^{-27} \text{ m}^3$

→  **$1.4206 \times 10^{-24} \text{ L}$**

(5) The concentration of AZO dye encapsulated in  $\text{AlPO}_4\text{-5}$

→ [value from (3)] / (# of Avogadro) / [value from (4)]

→  $3.94 \times 10^{-3} \text{ mole} \cdot \text{L}^{-1}$

→ **3.94 mM**

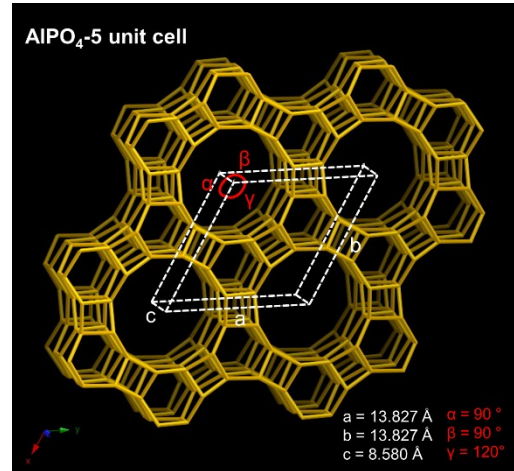

Fig. S5 The description for  $\text{AlPO}_4\text{-5}$  unit cell

**SI. 6 The relationship between relativity polarity and sensitivity of for AZO@AlPO<sub>4</sub>-5 in primary alcohol.**

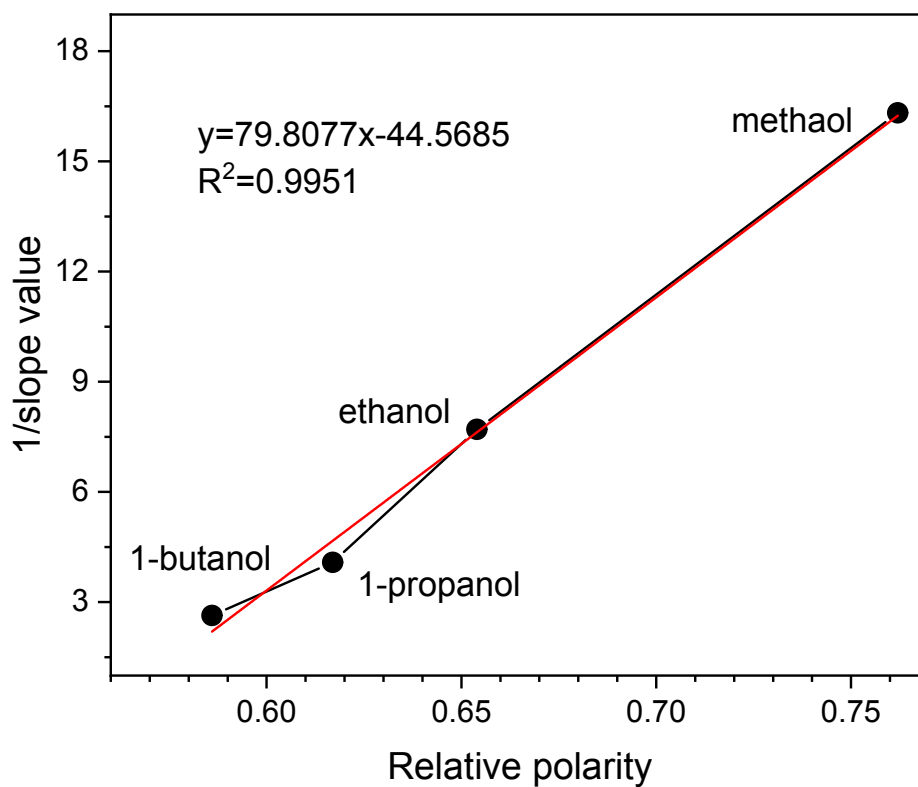

**Fig. S6** The plot for relationship between relativity polarity and sensitivity of AZO@AlPO<sub>4</sub>-5 in linear primary alcohol.



## SI. 7 The effect of dye loading on water detection sensitivity

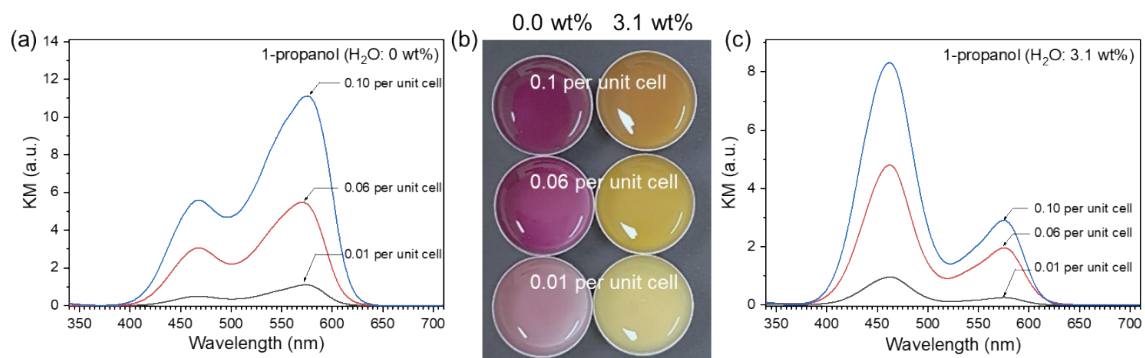

**Fig. S7** UV-vis absorption (Kubelka-Munk, K/M) spectra of different AZO dye loaded  $\text{AlPO}_4\text{-5}$  (0.01, 0.06 and 0.1 per unit cell) in (a) ethanol sample (0.0 wt%  $\text{H}_2\text{O}$ ), (c) ethanol sample (3.1 wt %  $\text{H}_2\text{O}$ ) and (b) digital photographic images as indicated.

## SI. 8 Evolution performance of recovered AZO@AIPO<sub>4-5</sub>

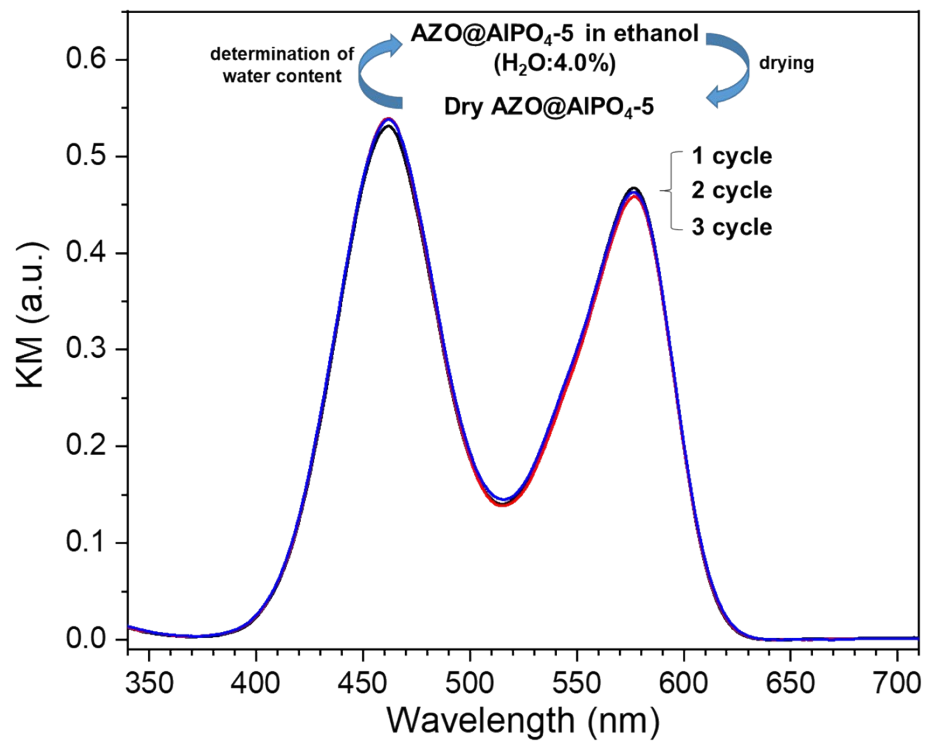

**Fig. S8.** UV-vis absorption spectra of fresh and recovered AZO@AIPO<sub>4-5</sub> dispersed ethanol sample (4.0 wt % H<sub>2</sub>O).
